# Supplementary material
Source: Springer Nature journal article supplement (https://www.springermedizin.de/resource/supplementary/12916_2011_451_MOESM2_ESM.pdf/9599712)

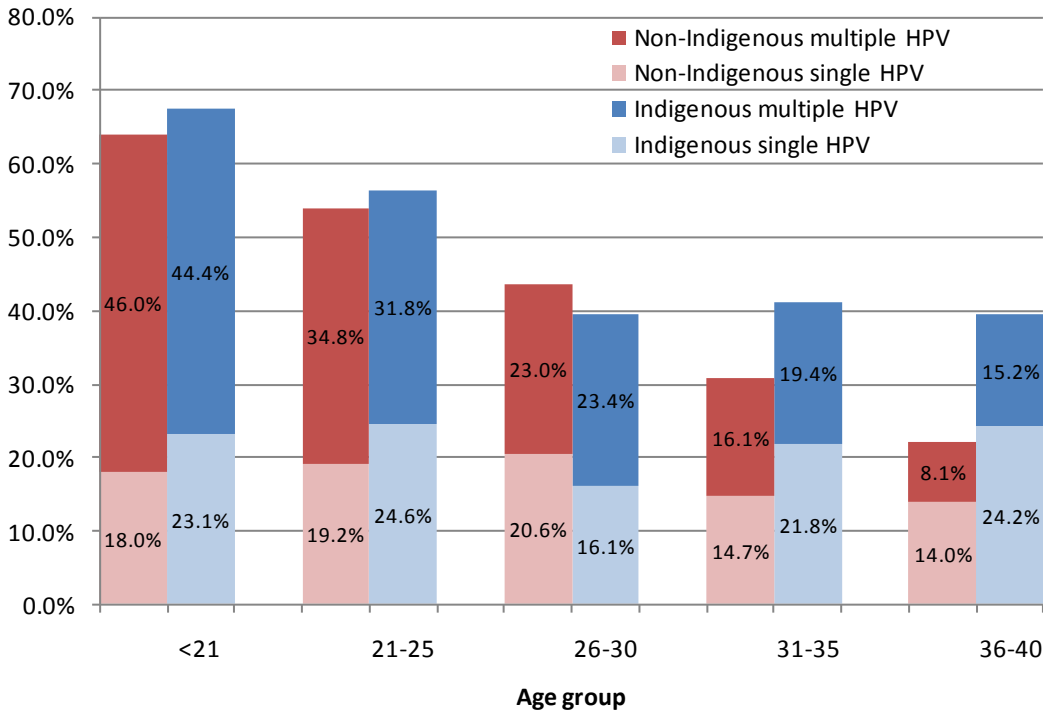

Supplement: MOESM2 [file 9599712]
